# Supplementary material
Source: PubMed Central journal article supplement (PMC7406306)
Supplement: jciinsight-5-134885-s139.pdf [file jciinsight-5-134885-s139.pdf]

## Supplementary Data

### Figure legends

**Supplementary Fig. 1 TH1579 affects human and murine mesothelioma cell viability.** ZL35, MSTO-211H human mesothelioma and AB1 and AE17 murine mesothelioma cells were seeded at  $3 \times 10^3$  cells/well in 96-well plates. The day after, cells were treated with vehicle or TH1579 (1-1000 $\mu$ M) and 24 h later cell viability was measured by XTT reduction. Data are presented as mean $\pm$ SEM, n=6 for each group, \*p<0.05 compared to vehicle by 2-tailed students' T test

**Supplementary Fig. 2 Pharmacological targeting of MTH1 elevates H2AX levels in mesothelioma tumor cells.** Tumor tissue sections of murine mesothelioma tumors were stained for  $\gamma$ H2Ax (A) Representative pictures. (B) Data presented as mean $\pm$ SEM, vehicle n=6, TH1579 n=4, \*p<0.05 compared to vehicle by 2-tailed students' T test. HPF: High Power Field. Scale bar: 100 $\mu$ m

**Supplementary Fig. 3 MTH1 expression is high in AB1 cells and low in AE17 and was modulated by using short hairpin RNAs targeting *Mth1* in the former or by introducing an MTH1 overexpressing vector to the latter.** AB1 or AE17 murine mesothelioma cells were seeded at  $5 \times 10^4$  cells/well in 6-well plates. The day after, AB1 cells were transfected with murine *Nudt1* shRNA Plasmid, while AE17 with Mth1ORF expression plasmid and transfected clones were isolated upon G418 selection (500 $\mu$ /ml) for 7 days. MTH1 expression was quantified by western blot. Representative blots of three independent experiments and results of densitometric analysis. Data presented as mean $\pm$ SEM, n=3 for each group, \*p<0.05 compared to AB1 by 2-tailed students' T test.

**Supplementary Fig. 4 MTH1 gene expression is down regulated by NF $\kappa$ B activation in endothelial cells.** (A) Serum starved endothelial cells were treated with

NFKB inducers TNFA (20ng/ml) (n=3) and PMA (5 $\mu$ M) (n=3) for 4h or vehicle (n=4) and MTH1 expression was measured 18h later. (B, C) Tumor cell cfDNA effects are mediated through NFKB. Serum starved AE17 tumor endothelial cells were treated with BAY11-7082 (10 $\mu$ M) (n=3), TNFA (20ng/ml) (n=3) or vehicle (n=4) for 40min and subsequently treated with 30ng cell free DNA (CfDNA) from AE17 (C) or AE17mth1 overexpressing cells (B) for 18h. Expression of MTH1 was measured by western blot. Shown are representative blots of three independent experiments. Data are presented as mean $\pm$ SEM, \*p<0.05 compared to vehicle by One-way ANOVA (with Bonferroni post hoc test).

**Supplementary Table 1.** List of differentially expressed genes between ‘high’ and ‘low’ *MTH1* expressing mesotheliomas. Between-group differential expression analysis was conducted using the edgeR package in R, after TMM normalization of raw counts was performed. The glmTreat function of edgeR was implemented for testing significant differences relative to fold-change thresholds. Genes with an adjusted p-value (Benjamini–Hochberg multiple hypothesis testing correction for False Discovery Rate control) < 0.05 and  $|\log_2(\text{Fold Change})| > 0.3$  were considered as differentially expressed.

**Supplementary Table 2.** List of significantly associated GO terms of biological processes derived by enrichment analysis of DEGs between ‘high’ and ‘low’ *MTH1* expressing mesotheliomas.

**Supplementary Table 3.** List of significantly associated GO terms of cellular components derived by enrichment analysis of DEGs between ‘high’ and ‘low’ *MTH1* expressing mesotheliomas.

**Supplementary Table 4.** List of significantly associated Reactome Pathway terms derived by enrichment analysis of DEGs between ‘high’ and ‘low’ *MTH1* expressing mesotheliomas.

# Supplementary Fig. 1

## A

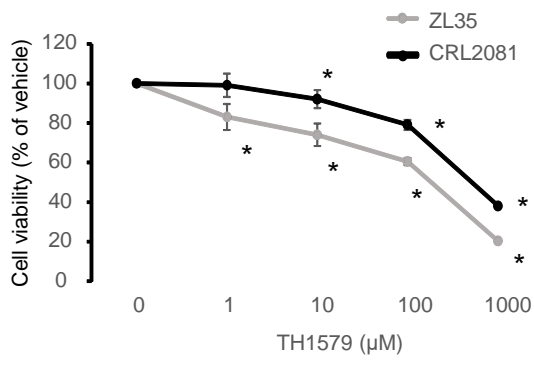

## B

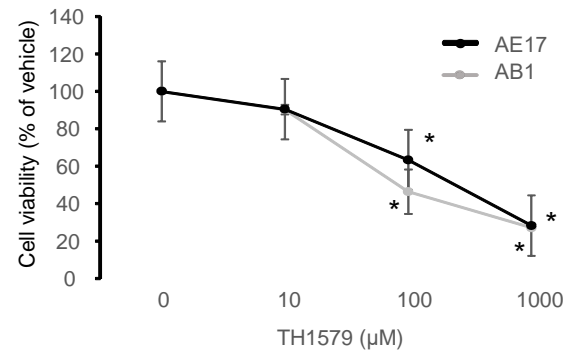

# Supplementary Fig. 2

TH1579 AB1

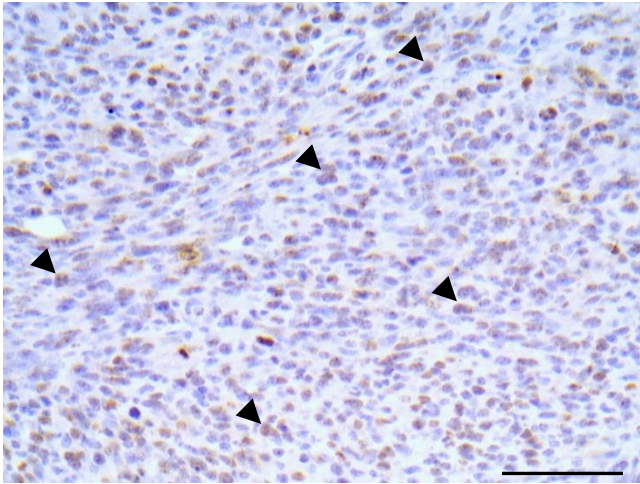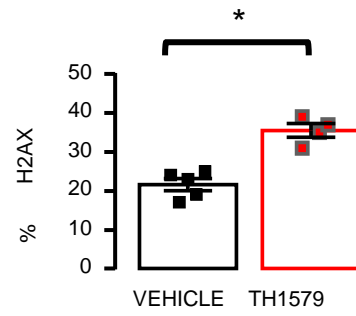

VEHICLE AB1

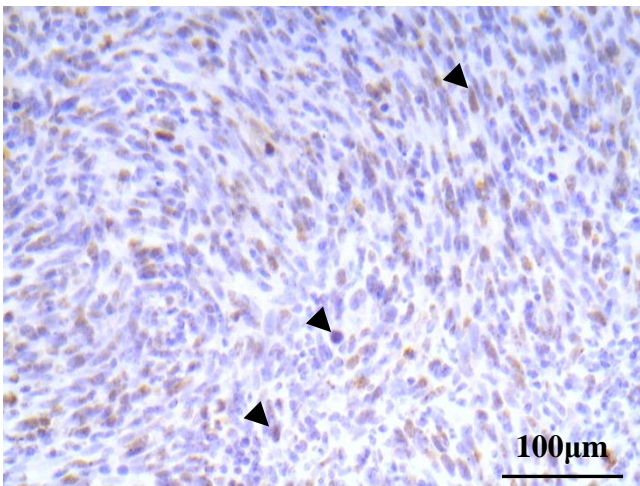

Arrowheads depicts positive nuclear staining; scale bar 100µm

# Supplementary Fig. 3

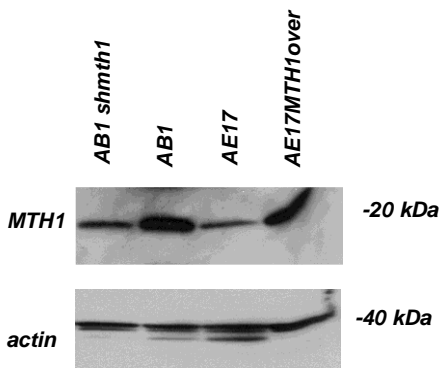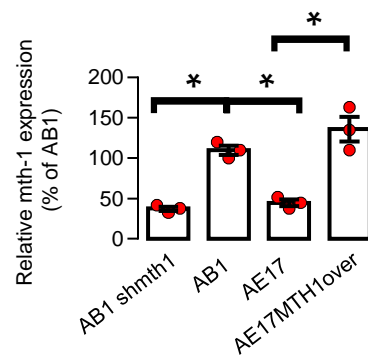

# Supplementary Fig. 4

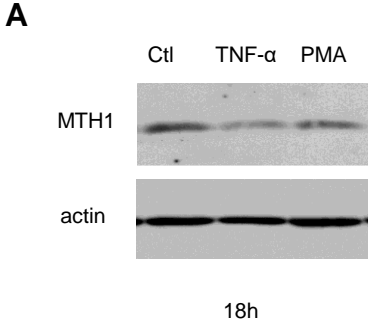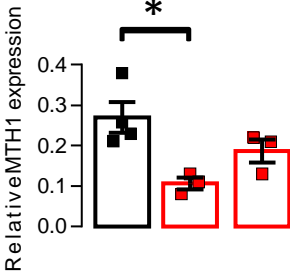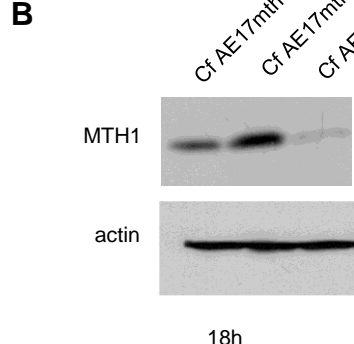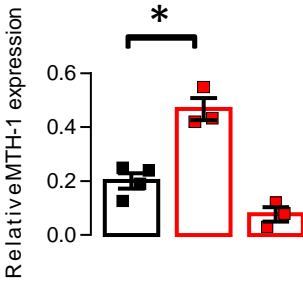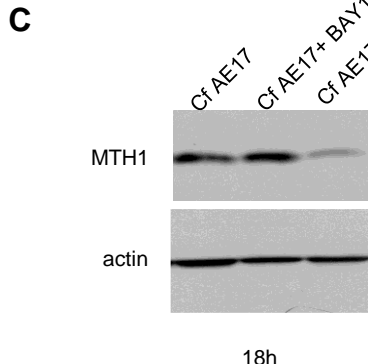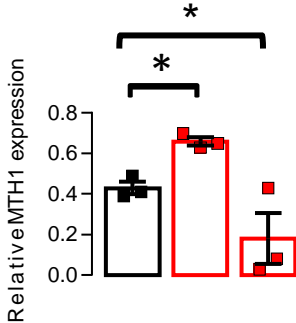

| Gene Symbol    | HGNC approved Gene Symbol | ENTREZ ID | logFC        | logCPM      | PValue      | FDR (adjusted Pvalue) |
|----------------|---------------------------|-----------|--------------|-------------|-------------|-----------------------|
| NUDT1          | NUDT1                     | 4521      | 1,637203032  | 4,248514099 | 3,38059E-10 | 4,76055E-06           |
| KIAA1244       | ARFGEF3                   | 57221     | -2,671426344 | 3,766499252 | 2,6199E-06  | 0,006626884           |
| NBEAL1         | NBEAL1                    | 65065     | -1,962630743 | 1,790482285 | 2,21247E-06 | 0,006626884           |
| WWC2           | WWC2                      | 80014     | -1,529119318 | 5,875021094 | 9,71096E-07 | 0,006626884           |
| WDFY3          | WDFY3                     | 23001     | -1,109675798 | 5,170533781 | 3,29415E-06 | 0,006626884           |
| ANKRD17        | ANKRD17                   | 26057     | -1,108660121 | 6,092621774 | 2,94127E-06 | 0,006626884           |
| CENPM          | CENPM                     | 79019     | 1,660753313  | 2,406441248 | 2,29192E-06 | 0,006626884           |
| FAM63B         | MINDY2                    | 54629     | -2,076590094 | 4,065084689 | 3,97431E-06 | 0,006995775           |
| TOR1AIP2       | TOR1AIP2                  | 163590    | -1,497155778 | 4,824989495 | 7,56198E-06 | 0,010648775           |
| ZNF428         | ZNF428                    | 126299    | 1,083823026  | 5,538959375 | 7,42525E-06 | 0,010648775           |
| FAM160A1       | FAM160A1                  | 729830    | -2,13298301  | 1,873164395 | 1,05072E-05 | 0,013451127           |
| CLOCK          | CLOCK                     | 9575      | -1,590166149 | 3,740724095 | 1,15711E-05 | 0,013578734           |
| AFF1           | AFF1                      | 4299      | -1,215211573 | 6,615922367 | 1,41333E-05 | 0,015309629           |
| ABO            | ABO                       | 28        | -2,356683743 | 0,490964988 | 1,67767E-05 | 0,016875005           |
| KLHL11         | KLHL11                    | 55175     | -1,82516978  | 0,519702593 | 2,25542E-05 | 0,017644886           |
| UTP14C         | UTP14C                    | 9724      | -0,938481576 | 5,194384505 | 2,00944E-05 | 0,017644886           |
| MPG            | MPG                       | 4350      | 1,064098698  | 6,440276178 | 2,19655E-05 | 0,017644886           |
| EMID2          | COL26A1                   | 136227    | 5,267355917  | 4,303610128 | 2,08325E-05 | 0,017644886           |
| MAP3K2         | MAP3K2                    | 10746     | -1,103321084 | 4,638849457 | 2,5438E-05  | 0,018853591           |
| SGMS2          | SGMS2                     | 166929    | -2,478413548 | 6,250451125 | 3,66662E-05 | 0,02023009            |
| PARD3B         | PARD3B                    | 117583    | -2,021998782 | 2,55228635  | 3,73514E-05 | 0,02023009            |
| SLC30A1        | SLC30A1                   | 7779      | -1,346815119 | 4,044839653 | 3,61263E-05 | 0,02023009            |
| ATP2B4         | ATP2B4                    | 493       | -1,106738729 | 7,995111062 | 3,06176E-05 | 0,02023009            |
| SEC24B         | SEC24B                    | 10427     | -0,902221173 | 5,330001085 | 3,65876E-05 | 0,02023009            |
| WASH5P         | WASH5P                    | 375690    | 1,21066703   | 3,586047651 | 2,99406E-05 | 0,02023009            |
| MXD3           | MXD3                      | 83463     | 1,221336682  | 4,177826734 | 3,49453E-05 | 0,02023009            |
| MRPL28         | MRPL28                    | 10573     | 1,075135257  | 6,314501838 | 4,2499E-05  | 0,022165588           |
| SMARCAD1       | SMARCAD1                  | 56916     | -0,943958071 | 4,792321072 | 4,93495E-05 | 0,02481928            |
| TAOK1          | TAOK1                     | 57551     | -1,911033402 | 3,387060818 | 7,15852E-05 | 0,026573339           |
| SOCS7          | SOCS7                     | 30837     | -1,861288911 | 1,208090686 | 7,64299E-05 | 0,026573339           |
| DKFZp686O24166 | NCR3LG1                   | 374383    | -1,661662246 | 2,245491655 | 6,56103E-05 | 0,026573339           |
| ZKSCAN1        | ZKSCAN1                   | 7586      | -1,499252396 | 4,644443032 | 7,15896E-05 | 0,026573339           |
| ASH1L          | ASH1L                     | 55870     | -1,127902593 | 6,068899056 | 6,63845E-05 | 0,026573339           |
| SDAD1          | SDAD1                     | 55153     | -0,888468751 | 5,060993366 | 7,28126E-05 | 0,026573339           |
| MLST8          | MLST8                     | 64223     | 0,83092888   | 5,653905803 | 7,45556E-05 | 0,026573339           |
| ASPSCR1        | ASPSCR1                   | 79058     | 0,874885701  | 4,884600852 | 5,88299E-05 | 0,026573339           |
| WRAP53         | WRAP53                    | 55135     | 0,983078612  | 3,801989686 | 6,63177E-05 | 0,026573339           |
| AP2S1          | AP2S1                     | 1175      | 1,021113191  | 6,721073094 | 7,73688E-05 | 0,026573339           |
| NMRAL1         | NMRAL1                    | 57407     | 1,040389123  | 5,741496727 | 5,52319E-05 | 0,026573339           |
| JOSD2          | JOSD2                     | 126119    | 1,247862018  | 5,163613012 | 6,34981E-05 | 0,026573339           |
| KCNN4          | KCNN4                     | 3783      | 2,78377451   | 5,220976766 | 6,65816E-05 | 0,026573339           |
| FAM73A         | MIGA1                     | 374986    | -1,09440762  | 3,761020032 | 8,65248E-05 | 0,028335864           |
| GADD45GIP1     | GADD45GIP1                | 90480     | 1,246543193  | 6,223295395 | 8,4981E-05  | 0,028335864           |
| NEB            | NEB                       | 4703      | -5,259755487 | 4,412720057 | 9,36526E-05 | 0,0299731             |
| LDB3           | LDB3                      | 11155     | -3,628527969 | 2,397188576 | 0,00010115  | 0,031322014           |
| CEP350         | CEP350                    | 9857      | -0,868931221 | 5,514201083 | 0,000102848 | 0,031322014           |
| PEX16          | PEX16                     | 9409      | 0,806702492  | 4,872086155 | 0,00010454  | 0,031322014           |
| GCC2           | GCC2                      | 9648      | -0,935606169 | 5,307224507 | 0,000108671 | 0,031881275           |
| C16orf13       | METTTL26                  | 84326     | 1,254764541  | 5,988927274 | 0,000111618 | 0,032077555           |
| RAB3GAP2       | RAB3GAP2                  | 25782     | -0,818342697 | 5,381454094 | 0,000114478 | 0,032241501           |
| TACSTD2        | TACSTD2                   | 4070      | -4,891789541 | 5,110280687 | 0,000130954 | 0,034060117           |
| UHMK1          | UHMK1                     | 127933    | -2,084654492 | 3,688409973 | 0,000157817 | 0,034060117           |
| HIPK3          | HIPK3                     | 10114     | -1,786771062 | 5,228120529 | 0,000175228 | 0,034060117           |
| HERC3          | HERC3                     | 8916      | -1,713446839 | 4,742855039 | 0,000160622 | 0,034060117           |
| ZNF641         | ZNF641                    | 121274    | -1,510623875 | 3,81037359  | 0,000192915 | 0,034060117           |
| ROCK2          | ROCK2                     | 9475      | -1,489780195 | 5,216333618 | 0,000169337 | 0,034060117           |
| MCTP2          | MCTP2                     | 55784     | -1,418352158 | 5,054399854 | 0,000188579 | 0,034060117           |
| RNF169         | RNF169                    | 254225    | -1,304958288 | 4,723159127 | 0,00013331  | 0,034060117           |
| CD46           | CD46                      | 4179      | -1,083769941 | 7,831772685 | 0,000164461 | 0,034060117           |

| Supplementary Table 1 cont |                           |           |              |             |             |                       |
|----------------------------|---------------------------|-----------|--------------|-------------|-------------|-----------------------|
| Gene Symbol                | HGNC approved Gene Symbol | ENTREZ ID | logFC        | logCPM      | PValue      | FDR (adjusted Pvalue) |
| RAPGEF2                    | RAPGEF2                   | 9693      | -1,070311901 | 5,032218816 | 0,00019408  | 0,034060117           |
| RBBP5                      | RBBP5                     | 5929      | -1,057356645 | 4,094383372 | 0,000154728 | 0,034060117           |
| KIAA1109                   | KIAA1109                  | 84162     | -1,057259991 | 5,584570462 | 0,000200752 | 0,034060117           |
| OTUD7B                     | OTUD7B                    | 56957     | -0,927750985 | 5,207236176 | 0,000190997 | 0,034060117           |
| DIS3                       | DIS3                      | 22894     | -0,841617097 | 5,311774593 | 0,000158329 | 0,034060117           |
| MED13                      | MED13                     | 9969      | -0,832652889 | 6,174393578 | 0,000142109 | 0,034060117           |
| ATF6                       | ATF6                      | 22926     | -0,82528914  | 5,897609134 | 0,000167975 | 0,034060117           |
| RAB33B                     | RAB33B                    | 83452     | -0,809559625 | 3,354801085 | 0,000193528 | 0,034060117           |
| CDC73                      | CDC73                     | 79577     | -0,751090217 | 5,210083622 | 0,000144411 | 0,034060117           |
| DRAP1                      | DRAP1                     | 10589     | 0,848857477  | 6,617276302 | 0,000186962 | 0,034060117           |
| PSMG3                      | PSMG3                     | 84262     | 0,854198722  | 5,231922579 | 0,000176961 | 0,034060117           |
| FASTK                      | FASTK                     | 10922     | 0,898957679  | 6,556629536 | 0,00017738  | 0,034060117           |
| NDUFS6                     | NDUFS6                    | 4726      | 1,00198944   | 6,435285469 | 0,000128849 | 0,034060117           |
| BCL7C                      | BCL7C                     | 9274      | 1,010944692  | 5,373067167 | 0,000131851 | 0,034060117           |
| C6orf226                   | C6orf226                  | 441150    | 1,104246779  | 2,372043601 | 0,000195719 | 0,034060117           |
| CHTF18                     | CHTF18                    | 63922     | 1,10690264   | 4,413970251 | 0,000195427 | 0,034060117           |
| POC1A                      | POC1A                     | 25886     | 1,112760911  | 3,061857891 | 0,000143064 | 0,034060117           |
| TACC3                      | TACC3                     | 10460     | 1,171093009  | 5,736429537 | 0,000179086 | 0,034060117           |
| PTTG1                      | PTTG1                     | 9232      | 1,294227929  | 4,322957973 | 0,000171545 | 0,034060117           |
| ATP5D                      | ATP5F1D                   | 513       | 1,36364488   | 6,367123739 | 0,000198676 | 0,034060117           |
| DNLZ                       | DNLZ                      | 728489    | 1,518428451  | 3,449556211 | 0,000153785 | 0,034060117           |
| APOE                       | APOE                      | 348       | 1,593756608  | 8,68459978  | 0,000148604 | 0,034060117           |
| PIF1                       | PIF1                      | 80119     | 1,726031655  | 2,113288234 | 0,000151264 | 0,034060117           |
| SYCE1L                     | SYCE1L                    | 100130958 | 2,118286578  | 1,040507645 | 0,000200544 | 0,034060117           |
| PIK3CA                     | PIK3CA                    | 5290      | -1,06833405  | 4,15597371  | 0,000216694 | 0,034709557           |
| OTUD4                      | OTUD4                     | 54726     | -1,066197008 | 5,644293    | 0,000214625 | 0,034709557           |
| COMMD1                     | COMMD1                    | 150684    | 0,943442539  | 4,318459739 | 0,000215562 | 0,034709557           |
| NOSIP                      | NOSIP                     | 51070     | 0,958876767  | 5,645488841 | 0,000216904 | 0,034709557           |
| C4orf48                    | C4orf48                   | 401115    | 1,940430196  | 3,727969607 | 0,000207452 | 0,034709557           |
| SLC4A4                     | SLC4A4                    | 8671      | -2,123694309 | 5,928459946 | 0,000222591 | 0,034828139           |
| FBXO28                     | FBXO28                    | 23219     | -0,696929133 | 5,247608143 | 0,000220483 | 0,034828139           |
| C1orf55                    | SDE2                      | 163859    | -1,033814043 | 4,508341843 | 0,000225586 | 0,034908857           |
| OSMR                       | OSMR                      | 9180      | -1,45771358  | 6,917498054 | 0,000233308 | 0,034999198           |
| CPNE3                      | CPNE3                     | 8895      | -0,850530232 | 6,740653195 | 0,000233626 | 0,034999198           |
| DTYMK                      | DTYMK                     | 1841      | 1,095062013  | 4,908439584 | 0,000230767 | 0,034999198           |
| PTPN14                     | PTPN14                    | 5784      | -1,435240854 | 4,175252864 | 0,000265632 | 0,03622604            |
| ARHGEF35                   | ARHGEF35                  | 445328    | -1,359156609 | 4,567913194 | 0,000266557 | 0,03622604            |
| ARHGEF12                   | ARHGEF12                  | 23365     | -1,199451474 | 7,263707262 | 0,000252587 | 0,03622604            |
| MLXIP                      | MLXIP                     | 22877     | -1,087232902 | 5,696668765 | 0,000270113 | 0,03622604            |
| MTR                        | MTR                       | 4548      | -0,906324873 | 5,752291877 | 0,00026006  | 0,03622604            |
| TPR                        | TPR                       | 7175      | -0,86644207  | 7,497748621 | 0,000268892 | 0,03622604            |
| BANF1                      | BANF1                     | 8815      | 0,78699859   | 7,245540228 | 0,000257171 | 0,03622604            |
| REEP4                      | REEP4                     | 80346     | 0,863631715  | 5,007312792 | 0,000254821 | 0,03622604            |
| APRT                       | APRT                      | 353       | 0,882273382  | 6,901689971 | 0,000261335 | 0,03622604            |
| HINT2                      | HINT2                     | 84681     | 1,214618011  | 4,762009426 | 0,000269409 | 0,03622604            |
| RECQL4                     | RECQL4                    | 9401      | 1,423890029  | 4,092881551 | 0,000255932 | 0,03622604            |
| FBXL3                      | FBXL3                     | 26224     | -0,908339946 | 5,300374898 | 0,000282945 | 0,037588933           |
| MCM5                       | MCM5                      | 4174      | 0,877354631  | 5,632050277 | 0,000287268 | 0,037806599           |
| ATP2A1                     | ATP2A1                    | 487       | -4,273918664 | 3,703748639 | 0,000330143 | 0,038460045           |
| KLF5                       | KLF5                      | 688       | -1,259212784 | 5,57167579  | 0,000327603 | 0,038460045           |
| LARP1B                     | LARP1B                    | 55132     | -1,230832238 | 3,766877414 | 0,000312127 | 0,038460045           |
| AKAP9                      | AKAP9                     | 10142     | -0,983877128 | 5,900805227 | 0,000314003 | 0,038460045           |
| USP38                      | USP38                     | 84640     | -0,885324557 | 4,786030088 | 0,000318868 | 0,038460045           |
| EXOC8                      | EXOC8                     | 149371    | -0,820930938 | 4,455517618 | 0,000327884 | 0,038460045           |
| G3BP2                      | G3BP2                     | 9908      | -0,766358503 | 6,717628263 | 0,00030666  | 0,038460045           |
| POLD1                      | POLD1                     | 5424      | 0,812872241  | 5,249854501 | 0,000319361 | 0,038460045           |
| SNRPD2                     | SNRPD2                    | 6633      | 0,856333751  | 7,535102055 | 0,000306761 | 0,038460045           |
| NDUFB10                    | NDUFB10                   | 4716      | 0,898235514  | 6,455154603 | 0,000328563 | 0,038460045           |
| TRAPPC1                    | TRAPPC1                   | 58485     | 0,913172245  | 6,636973942 | 0,000303207 | 0,038460045           |
| PGP                        | PGP                       | 283871    | 0,983538045  | 4,504841378 | 0,000330469 | 0,038460045           |



# Supplementary Table 1 cont

| Gene Symbol | HGNC approved Gene Symbol | ENTREZ ID | logFC        | logCPM      | PValue      | FDR (adjusted Pvalue) |
|-------------|---------------------------|-----------|--------------|-------------|-------------|-----------------------|
| CEMP1       | CEMP1                     | 752014    | 1,553078181  | 4,220632894 | 0,000304186 | 0,038460045           |
| RHBDL1      | RHBDL1                    | 9028      | 1,738235994  | 1,515032906 | 0,000311282 | 0,038460045           |
| USO1        | USO1                      | 8615      | -0,914857495 | 6,476279535 | 0,000334439 | 0,038603073           |
| KCND3       | KCND3                     | 3752      | -2,383339423 | 1,488221363 | 0,000339898 | 0,038673435           |
| RIF1        | RIF1                      | 55183     | -1,171874632 | 4,627682653 | 0,000340542 | 0,038673435           |
| MBNL2       | MBNL2                     | 10150     | -0,925918817 | 6,030518088 | 0,000348579 | 0,038957903           |
| ZFPM1       | ZFPM1                     | 161882    | 1,088356303  | 3,380309206 | 0,00034799  | 0,038957903           |
| SYNE2       | SYNE2                     | 23224     | -1,735887067 | 6,456946152 | 0,000361249 | 0,0390962             |
| NAF1        | NAF1                      | 92345     | -1,062196205 | 3,036993568 | 0,00036711  | 0,0390962             |
| SNRPA       | SNRPA                     | 6626      | 0,725086498  | 6,09659099  | 0,000366014 | 0,0390962             |
| FAM86A      | EEF2KMT                   | 196483    | 0,860420222  | 4,333023418 | 0,000364301 | 0,0390962             |
| RABAC1      | RABAC1                    | 10567     | 0,956260298  | 6,83153469  | 0,000359532 | 0,0390962             |
| C17orf90    | OXLD1                     | 339229    | 0,97826259   | 4,697472335 | 0,000369251 | 0,0390962             |
| ATOX1       | ATOX1                     | 475       | 1,117811468  | 5,678164869 | 0,000357602 | 0,0390962             |
| SHISA3      | SHISA3                    | 152573    | -3,371336233 | 2,40575809  | 0,000375935 | 0,039506828           |
| AGER        | AGER                      | 177       | -4,552770557 | 6,307981294 | 0,000451592 | 0,040292348           |
| CA3         | CA3                       | 761       | -3,931962578 | 4,126453291 | 0,000429433 | 0,040292348           |
| S100A1      | S100A1                    | 6271      | -3,716528992 | 3,805217477 | 0,00043025  | 0,040292348           |
| LRRC55      | LRRC55                    | 219527    | -2,563906979 | 0,908967272 | 0,000458013 | 0,040292348           |
| GCNT4       | GCNT4                     | 51301     | -1,903915568 | 0,648591009 | 0,000451853 | 0,040292348           |
| CCNT1       | CCNT1                     | 904       | -1,825565988 | 2,082117049 | 0,000400235 | 0,040292348           |
| ADAMTS15    | ADAMTS15                  | 170689    | -1,763705676 | 5,038586213 | 0,000458817 | 0,040292348           |
| LMTK2       | LMTK2                     | 22853     | -1,503657166 | 3,706354323 | 0,000448539 | 0,040292348           |
| PAFAH1B2    | PAFAH1B2                  | 5049      | -1,164999818 | 4,286897489 | 0,000402799 | 0,040292348           |
| GTF3C4      | GTF3C4                    | 9329      | -1,057628733 | 3,793390564 | 0,00044547  | 0,040292348           |
| PDLIM5      | PDLIM5                    | 10611     | -1,016008886 | 7,162373094 | 0,000463521 | 0,040292348           |
| KIDINS220   | KIDINS220                 | 57498     | -0,908925997 | 6,507671456 | 0,000451411 | 0,040292348           |
| INTS6       | INTS6                     | 26512     | -0,888740271 | 4,431028301 | 0,000407548 | 0,040292348           |
| EDEM3       | EDEM3                     | 80267     | -0,858314838 | 5,573296731 | 0,000461265 | 0,040292348           |
| AKAP11      | AKAP11                    | 11215     | -0,846220471 | 5,21550263  | 0,00042395  | 0,040292348           |
| SMEK2       | PPP4R3B                   | 57223     | -0,773594371 | 6,197706448 | 0,00043824  | 0,040292348           |
| SHFM1       | SEM1                      | 7979      | 0,740580118  | 6,909759281 | 0,000456758 | 0,040292348           |
| NARFL       | CIAO3                     | 64428     | 0,780098421  | 5,093848474 | 0,000405687 | 0,040292348           |
| PSMC3       | PSMC3                     | 5702      | 0,808602177  | 7,445508717 | 0,000431715 | 0,040292348           |
| ZNHIT1      | ZNHIT1                    | 10467     | 0,840024407  | 6,541043526 | 0,000425945 | 0,040292348           |
| MRPS34      | MRPS34                    | 65993     | 0,843532046  | 6,223967184 | 0,000427418 | 0,040292348           |
| MTG1        | MTG1                      | 92170     | 0,845045531  | 4,85160551  | 0,000444088 | 0,040292348           |
| FAM173A     | FAM173A                   | 65990     | 1,044897875  | 3,402509969 | 0,000396392 | 0,040292348           |
| MGC70857    | C8orf82                   | 414919    | 1,058905831  | 4,689421369 | 0,000463525 | 0,040292348           |
| UBE2S       | UBE2S                     | 27338     | 1,063726136  | 4,646621863 | 0,000442932 | 0,040292348           |
| SAC3D1      | SAC3D1                    | 29901     | 1,215361043  | 3,964016178 | 0,000395952 | 0,040292348           |
| MRPL41      | MRPL41                    | 64975     | 1,359746573  | 5,4819003   | 0,000443082 | 0,040292348           |
| VGFB        | VGFB                      | 7425      | 3,464110807  | 2,106704653 | 0,000461737 | 0,040292348           |
| CRIM1       | CRIM1                     | 51232     | -1,440808169 | 8,845095774 | 0,000472087 | 0,040784841           |
| ERN1        | ERN1                      | 2081      | -1,677731093 | 3,460330066 | 0,000479715 | 0,040920081           |
| TMSB10      | TMSB10                    | 9168      | 0,938371859  | 10,7550631  | 0,000479406 | 0,040920081           |
| NDUFB7      | NDUFB7                    | 4713      | 0,981425743  | 6,714953125 | 0,00048237  | 0,040920081           |
| ETV3        | ETV3                      | 2117      | -1,4923578   | 2,445622587 | 0,000488095 | 0,041043014           |
| KIF22       | KIF22                     | 3835      | 0,859458613  | 5,799033799 | 0,000489648 | 0,041043014           |
| PCDHGB1     | PCDHGB1                   | 56104     | -3,155984125 | 2,647364526 | 0,000510029 | 0,041101115           |
| ZC3HAV1L    | ZC3HAV1L                  | 92092     | -1,643830089 | 1,271091007 | 0,000506361 | 0,041101115           |
| MED1        | MED1                      | 5469      | -0,675028534 | 5,747737348 | 0,000516302 | 0,041101115           |
| NDUFS3      | NDUFS3                    | 4722      | 0,744415722  | 6,309766648 | 0,00051661  | 0,041101115           |
| FLYWCH2     | FLYWCH2                   | 114984    | 0,818365587  | 4,513664732 | 0,000513789 | 0,041101115           |
| CDK5        | CDK5                      | 1020      | 0,883311177  | 4,417314584 | 0,000508202 | 0,041101115           |
| NAGLU       | NAGLU                     | 4669      | 0,893567737  | 5,920250902 | 0,000497137 | 0,041101115           |
| CENPH       | CENPH                     | 64946     | 0,934512628  | 2,98939642  | 0,000511115 | 0,041101115           |
| CDT1        | CDT1                      | 81620     | 1,411934307  | 4,210379133 | 0,000499868 | 0,041101115           |
| CENPP       | CENPP                     | 401541    | 1,139593125  | 2,510928166 | 0,0005199   | 0,041130516           |
| C1orf58     | BROX                      | 148362    | -1,31689863  | 3,509917404 | 0,00052343  | 0,041178454           |

# Supplementary Table 1 cont

| Gene Symbol | HGNC approved Gene Symbol | ENTREZ ID | logFC        | logCPM      | PValue      | FDR (adjusted Pvalue) |
|-------------|---------------------------|-----------|--------------|-------------|-------------|-----------------------|
| PSMB3       | PSMB3                     | 5691      | 0,854347119  | 7,071839172 | 0,000528722 | 0,041363646           |
| DNAJB14     | DNAJB14                   | 79982     | -0,959124754 | 3,138196609 | 0,000544664 | 0,042375493           |
| IDH2        | IDH2                      | 3418      | 0,934216569  | 6,078802428 | 0,000555431 | 0,042975705           |
| NTHL1       | NTHL1                     | 4913      | 0,969276732  | 3,339647633 | 0,000558838 | 0,04300302            |
| MRPL51      | MRPL51                    | 51258     | 0,755273351  | 6,667577862 | 0,000563362 | 0,043115591           |
| PDZD8       | PDZD8                     | 118987    | -1,399854378 | 4,086420993 | 0,000567154 | 0,043171142           |
| AQP3        | AQP3                      | 360       | -4,035802905 | 6,280685053 | 0,000585683 | 0,043429397           |
| KDR         | KDR                       | 3791      | -1,755659041 | 7,856053128 | 0,000591507 | 0,043429397           |
| SECISBP2L   | SECISBP2L                 | 9728      | -1,062188968 | 5,580526007 | 0,000589956 | 0,043429397           |
| LRBA        | LRBA                      | 987       | -0,93924805  | 5,384795429 | 0,000579773 | 0,043429397           |
| TWF2        | TWF2                      | 11344     | 0,833457962  | 6,50214079  | 0,000593793 | 0,043429397           |
| ZMAT5       | ZMAT5                     | 55954     | 0,844192548  | 3,615860803 | 0,000595219 | 0,043429397           |
| NUDT18      | NUDT18                    | 79873     | 1,029187995  | 3,959484005 | 0,000593083 | 0,043429397           |
| C6orf26     | SAPCD1                    | 401251    | 1,128226196  | 1,082289012 | 0,000578325 | 0,043429397           |
| BMPR2       | BMPR2                     | 659       | -0,935687376 | 6,780534178 | 0,000605437 | 0,043947222           |
| ZNF770      | ZNF770                    | 54989     | -0,863486257 | 5,118865099 | 0,000629916 | 0,043989757           |
| FNDC3A      | FNDC3A                    | 22862     | -0,828842306 | 6,152683823 | 0,00062647  | 0,043989757           |
| BTBD7       | BTBD7                     | 55727     | -0,808714778 | 4,557981384 | 0,000613647 | 0,043989757           |
| SEC31A      | SEC31A                    | 22872     | -0,648516897 | 7,725659208 | 0,000610128 | 0,043989757           |
| THOC6       | THOC6                     | 79228     | 0,844549671  | 5,572278775 | 0,000617152 | 0,043989757           |
| LSM7        | LSM7                      | 51690     | 0,906727732  | 5,380119111 | 0,000624839 | 0,043989757           |
| LRDD        | PIDD1                     | 55367     | 1,132492882  | 4,640775312 | 0,000631013 | 0,043989757           |
| C9orf100    | ARHGEF39                  | 84904     | 1,25478528   | 2,618186968 | 0,00063     | 0,043989757           |
| GSTZ1       | GSTZ1                     | 2954      | 1,051241922  | 3,667006014 | 0,000644366 | 0,044120775           |
| LSMD1       | NAA38                     | 84316     | 1,051626139  | 5,337108454 | 0,000648936 | 0,044120775           |
| ETFB        | ETFB                      | 2109      | 1,088529958  | 6,305985022 | 0,000651692 | 0,044120775           |
| TRAPPC5     | TRAPPC5                   | 126003    | 1,255174908  | 5,365813481 | 0,00064266  | 0,044120775           |
| POLE2       | POLE2                     | 5427      | 1,613851161  | 0,786138465 | 0,000650227 | 0,044120775           |
| ARHGAP22    | ARHGAP22                  | 58504     | 1,79392767   | 3,710901691 | 0,000641895 | 0,044120775           |
| SLC1A7      | SLC1A7                    | 6512      | 3,892893368  | 3,5706866   | 0,000655437 | 0,044162021           |
| MRPL27      | MRPL27                    | 51264     | 0,865953142  | 5,597995303 | 0,000661452 | 0,044355049           |
| EGFR        | EGFR                      | 1956      | -1,652119901 | 5,742313586 | 0,000677446 | 0,044445341           |
| URB2        | URB2                      | 9816      | -1,177668165 | 4,163447778 | 0,000678579 | 0,044445341           |
| TRIP11      | TRIP11                    | 9321      | -0,837590158 | 4,544861283 | 0,000670351 | 0,044445341           |
| COMMD4      | COMMD4                    | 54939     | 0,800359551  | 6,195192997 | 0,000669786 | 0,044445341           |
| GPX1        | GPX1                      | 2876      | 0,9162322    | 8,769290249 | 0,000675574 | 0,044445341           |
| SLC25A35    | SLC25A35                  | 399512    | 0,883144504  | 2,282362145 | 0,000693038 | 0,045141565           |
| PCOLCE      | PCOLCE                    | 5118      | 1,595244612  | 8,808279661 | 0,00069562  | 0,045141565           |
| ASCC3       | ASCC3                     | 10973     | -0,833344013 | 5,482195448 | 0,000710396 | 0,045580405           |
| BCL2L12     | BCL2L12                   | 83596     | 0,807753213  | 3,78942136  | 0,000712217 | 0,045580405           |
| BLOC1S1     | BLOC1S1                   | 2647      | 0,851719319  | 6,158736419 | 0,000712824 | 0,045580405           |
| DCI         | ECI1                      | 1632      | 0,990046159  | 5,947175998 | 0,000715945 | 0,045580405           |
| RNASEH2A    | RNASEH2A                  | 10535     | 1,046148403  | 4,860155903 | 0,000718566 | 0,045580405           |
| FLVCR1      | FLVCR1                    | 28982     | -1,076630033 | 2,211768704 | 0,000723012 | 0,045582479           |
| NDUFB11     | NDUFB11                   | 54539     | 1,047892549  | 6,490129934 | 0,000725073 | 0,045582479           |
| C1orf107    | UTP25                     | 27042     | -0,846400354 | 4,946745839 | 0,000728617 | 0,045601693           |
| POLR1B      | POLR1B                    | 84172     | -0,817471664 | 4,831991026 | 0,000737569 | 0,045957709           |
| ATF2        | ATF2                      | 1386      | -1,134148606 | 4,224950313 | 0,000752018 | 0,046093781           |
| HSPBP1      | HSPBP1                    | 23640     | 0,859301539  | 5,649217197 | 0,000750114 | 0,046093781           |
| TREX1       | TREX1                     | 11277     | 0,986719457  | 4,113022547 | 0,000750829 | 0,046093781           |
| LOC282997   | LOC282997                 | 282997    | 1,232736117  | 1,970744036 | 0,000752845 | 0,046093781           |
| COPE        | COPE                      | 11316     | 0,793748354  | 7,468144593 | 0,000761861 | 0,046443842           |
| CAMSAP1L1   | CAMSAP2                   | 23271     | -0,8020619   | 6,507250716 | 0,000768115 | 0,046623285           |
| COX5B       | COX5B                     | 1329      | 0,976181636  | 6,923111555 | 0,000783327 | 0,047316489           |
| SPRN        | SPRN                      | 503542    | 1,293424904  | 2,9083426   | 0,000786256 | 0,047316489           |
| STBD1       | STBD1                     | 8987      | -1,566870348 | 3,538480171 | 0,000802766 | 0,047900611           |
| ZNF678      | ZNF678                    | 339500    | -1,488823696 | 0,860589978 | 0,000801286 | 0,047900611           |
| TM9SF2      | TM9SF2                    | 9375      | -1,051079222 | 7,029050612 | 0,000810817 | 0,047974452           |
| MND1        | MND1                      | 84057     | 1,287398274  | 0,835701581 | 0,000810657 | 0,047974452           |

# Supplementary Table 1 cont

| Gene Symbol | HGNC approved Gene Symbol | ENTREZ ID | logFC        | logCPM      | PValue      | FDR (adjusted Pvalue) |
|-------------|---------------------------|-----------|--------------|-------------|-------------|-----------------------|
| YIF1B       | YIF1B                     | 90522     | 0,825732849  | 5,763762729 | 0,000816755 | 0,048123631           |
| RNF6        | RNF6                      | 6049      | -0,759134461 | 4,973747551 | 0,00082679  | 0,048511885           |
| NUBP2       | NUBP2                     | 10101     | 0,728046395  | 5,921723759 | 0,000831838 | 0,048605578           |
| SARS2       | SARS2                     | 54938     | 0,813292889  | 4,30324278  | 0,00083547  | 0,04861607            |
| SEL1L       | SEL1L                     | 6400      | -0,799250127 | 6,678573577 | 0,000842129 | 0,04880192            |
| TCEB2       | ELOB                      | 6923      | 0,990022849  | 7,322198898 | 0,000847712 | 0,04892411            |
| PPP1R15B    | PPP1R15B                  | 84919     | -1,221789632 | 6,667635225 | 0,000859801 | 0,049174187           |
| SNHG11      | SNHG11                    | 128439    | 0,944053899  | 3,319851377 | 0,000859534 | 0,049174187           |
| AURKB       | AURKB                     | 9212      | 1,651815464  | 3,463222985 | 0,000862521 | 0,049174187           |
| HECTD1      | HECTD1                    | 25831     | -0,881030935 | 6,519159851 | 0,000866928 | 0,049226139           |
| TGFA        | TGFA                      | 7039      | -1,875685999 | 1,803823941 | 0,000887281 | 0,049779646           |
| EP300       | EP300                     | 2033      | -0,8588935   | 5,749666948 | 0,000881583 | 0,049779646           |
| TELO2       | TELO2                     | 9894      | 0,705774735  | 5,453458771 | 0,000884795 | 0,049779646           |

# Supplementary Table 2

| Term id    | Term Definition                                        | Enrichment | Corrected pvalue |
|------------|--------------------------------------------------------|------------|------------------|
| GO:0045333 | cellular respiration                                   | 10/168     | 0.0004           |
| GO:0006901 | vesicle coating                                        | 6/67       | 0.0013           |
| GO:0051651 | maintenance of location in cell                        | 7/94       | 0.0015           |
| GO:0090114 | COPII-coated vesicle budding                           | 6/69       | 0.0023           |
| GO:0048199 | vesicle targeting, to, from or within Golgi            | 6/70       | 0.003            |
| GO:0006414 | translational elongation                               | 8/125      | 0.0035           |
| GO:0045930 | negative regulation of mitotic cell cycle              | 14/334     | 0.0049           |
| GO:0090068 | positive regulation of cell cycle process              | 13/301     | 0.0053           |
| GO:0048194 | Golgi vesicle budding                                  | 6/77       | 0.0066           |
| GO:0009394 | 2'-deoxyribonucleotide metabolic process               | 4/31       | 0.0071           |
| GO:1903358 | regulation of Golgi organization                       | 3/15       | 0.0076           |
| GO:0006281 | DNA repair                                             | 18/508     | 0.0083           |
| GO:0007049 | cell cycle                                             | 36/1316    | 0.0084           |
| GO:0015980 | energy derivation by oxidation of organic compounds    | 11/237     | 0.0093           |
| GO:0019692 | deoxyribose phosphate metabolic process                | 4/33       | 0.0095           |
| GO:0031145 | anaphase-promoting complex-dependent catabolic process | 6/83       | 0.0104           |
| GO:0022904 | respiratory electron transport chain                   | 7/112      | 0.0105           |
| GO:0009262 | deoxyribonucleotide metabolic process                  | 4/35       | 0.0109           |
| GO:0045786 | negative regulation of cell cycle                      | 20/611     | 0.012            |
| GO:0010965 | regulation of mitotic sister chromatid separation      | 5/58       | 0.0126           |
| GO:0000723 | telomere maintenance                                   | 7/113      | 0.0133           |
| GO:0006260 | DNA replication                                        | 10/215     | 0.0141           |
| GO:0035855 | megakaryocyte development                              | 3/17       | 0.0142           |
| GO:0070125 | mitochondrial translational elongation                 | 6/88       | 0.0142           |
| GO:0042775 | mitochondrial ATP synthesis coupled electron transport | 6/91       | 0.0148           |
| GO:0006119 | oxidative phosphorylation                              | 7/117      | 0.0162           |
| GO:0042773 | ATP synthesis coupled electron transport               | 6/92       | 0.0172           |
| GO:0046825 | regulation of protein export from nucleus              | 4/39       | 0.0176           |
| GO:0009264 | deoxyribonucleotide catabolic process                  | 3/19       | 0.0185           |

# Supplementary Table 2

| Term id    | Term Definition                                                                                                     | Enrichment | Corrected pvalue |
|------------|---------------------------------------------------------------------------------------------------------------------|------------|------------------|
| GO:0006974 | cellular response to DNA damage stimulus                                                                            | 23/779     | 0.0188           |
| GO:0022402 | cell cycle process                                                                                                  | 27/958     | 0.02             |
| GO:0032200 | telomere organization                                                                                               | 7/126      | 0.02             |
| GO:0051656 | establishment of organelle localization                                                                             | 13/351     | 0.0203           |
| GO:0006900 | vesicle budding from membrane                                                                                       | 6/95       | 0.0205           |
| GO:0051052 | regulation of DNA metabolic process                                                                                 | 13/348     | 0.0216           |
| GO:0006415 | translational termination                                                                                           | 6/97       | 0.023            |
| GO:0006996 | organelle organization                                                                                              | 74/3363    | 0.0238           |
| GO:0000075 | cell cycle checkpoint                                                                                               | 9/201      | 0.0246           |
| GO:0051235 | maintenance of location                                                                                             | 8/163      | 0.025            |
| GO:0006259 | DNA metabolic process                                                                                               | 22/744     | 0.0256           |
| GO:0033047 | regulation of mitotic sister chromatid segregation                                                                  | 5/69       | 0.0259           |
| GO:0006284 | base-excision repair                                                                                                | 4/43       | 0.0269           |
| GO:0030219 | megakaryocyte differentiation                                                                                       | 3/22       | 0.0274           |
| GO:0070509 | calcium ion import                                                                                                  | 4/44       | 0.0285           |
| GO:1902961 | positive regulation of aspartic-type endopeptidase activity involved in amyloid precursor protein catabolic process | 2/7        | 0.029            |
| GO:0031648 | protein destabilization                                                                                             | 4/46       | 0.0302           |
| GO:0045787 | positive regulation of cell cycle                                                                                   | 14/405     | 0.0303           |
| GO:0010564 | regulation of cell cycle process                                                                                    | 23/803     | 0.0304           |
| GO:0072358 | cardiovascular system development                                                                                   | 17/527     | 0.0309           |
| GO:0016241 | regulation of macroautophagy                                                                                        | 8/171      | 0.031            |
| GO:0009411 | response to UV                                                                                                      | 7/139      | 0.0314           |
| GO:0043624 | cellular protein complex disassembly                                                                                | 7/137      | 0.0318           |
| GO:0098751 | bone cell development                                                                                               | 3/24       | 0.0325           |
| GO:0033554 | cellular response to stress                                                                                         | 41/1695    | 0.0343           |
| GO:0051972 | regulation of telomerase activity                                                                                   | 4/49       | 0.0349           |
| GO:0051650 | establishment of vesicle localization                                                                               | 8/174      | 0.0352           |
| GO:2000278 | regulation of DNA biosynthetic process                                                                              | 6/110      | 0.0368           |
| GO:0072359 | circulatory system development                                                                                      | 24/872     | 0.0384           |
| GO:1902959 | regulation of aspartic-type endopeptidase activity involved in amyloid precursor protein catabolic process          | 2/9        | 0.0384           |
| GO:0051276 | chromosome organization                                                                                             | 28/1068    | 0.0385           |
| GO:0051726 | regulation of cell cycle                                                                                            | 31/1221    | 0.0387           |
| GO:0034644 | cellular response to UV                                                                                             | 5/79       | 0.0392           |
| GO:1900101 | regulation of endoplasmic reticulum unfolded protein response                                                       | 3/26       | 0.0394           |
| GO:0032543 | mitochondrial translation                                                                                           | 6/112      | 0.0404           |
| GO:0071902 | positive regulation of protein serine/threonine kinase activity                                                     | 12/335     | 0.0409           |
| GO:0016310 | phosphorylation                                                                                                     | 33/1326    | 0.0429           |
| GO:0051648 | vesicle localization                                                                                                | 8/185      | 0.0436           |
| GO:0051347 | positive regulation of transferase activity                                                                         | 19/652     | 0.0442           |
| GO:0001944 | vasculature development                                                                                             | 16/517     | 0.0442           |
| GO:0033045 | regulation of sister chromatid segregation                                                                          | 5/81       | 0.0444           |
| GO:0031570 | DNA integrity checkpoint                                                                                            | 7/151      | 0.0447           |
| GO:0051640 | organelle localization                                                                                              | 17/564     | 0.0455           |
| GO:0043618 | regulation of transcription from RNA polymerase II promoter in response to stress                                   | 6/120      | 0.0474           |
| GO:0034654 | nucleobase-containing compound biosynthetic process                                                                 | 28/1090    | 0.0475           |
| GO:0021795 | cerebral cortex cell migration                                                                                      | 4/54       | 0.0475           |
| GO:0051641 | cellular localization                                                                                               | 53/2387    | 0.0487           |
| GO:0000186 | activation of MAPKK activity                                                                                        | 4/55       | 0.0487           |
| GO:0046777 | protein autophosphorylation                                                                                         | 8/191      | 0.0498           |

# Supplementary Table 3

| Term id    | Term Definition               | Enrichment | Corrected pvalue |
|------------|-------------------------------|------------|------------------|
| GO:0098687 | chromosomal region            | 17/348     | 0.0027           |
| GO:0005759 | mitochondrial matrix          | 20/470     | 0.0053           |
| GO:0005694 | chromosome                    | 32/1076    | 0.0073           |
| GO:0000781 | chromosome, telomeric region  | 9/158      | 0.0081           |
| GO:0044428 | nuclear part                  | 98/4553    | 0.0127           |
| GO:0044427 | chromosomal part              | 28/952     | 0.0139           |
| GO:0044429 | mitochondrial part            | 30/1055    | 0.0164           |
| GO:0031981 | nuclear lumen                 | 90/4167    | 0.0186           |
| GO:0098798 | mitochondrial protein complex | 12/280     | 0.0228           |
| GO:0035861 | site of double-strand break   | 5/59       | 0.0242           |
| GO:0016234 | inclusion body                | 6/82       | 0.0244           |
| GO:0005654 | nucleoplasm                   | 77/3524    | 0.029            |
| GO:0002079 | inner acrosomal membrane      | 2/5        | 0.0312           |
| GO:0005739 | mitochondrion                 | 40/1603    | 0.0335           |
| GO:0031965 | nuclear membrane              | 12/303     | 0.037            |
| GO:1902494 | catalytic complex             | 35/1378    | 0.0413           |
| GO:0031931 | TORC1 complex                 | 2/7        | 0.0422           |
| GO:0090734 | site of DNA damage            | 5/72       | 0.0461           |
| GO:0000776 | kinetochore                   | 7/135      | 0.0465           |
| GO:0030662 | coated vesicle membrane       | 8/177      | 0.0481           |

# Supplementary Table 4

| <b>Term id</b> | <b>Term Definition</b>                                                                                              | <b>Enrichment</b> | <b>Corrected pvalue</b> |
|----------------|---------------------------------------------------------------------------------------------------------------------|-------------------|-------------------------|
| 2564830        | Cytosolic iron-sulfur cluster assembly                                                                              | 3/13              | 0.0025                  |
| 204005         | COPII-mediated vesicle transport                                                                                    | 6/68              | 0.0049                  |
| 1428517        | The citric acid (TCA) cycle and respiratory electron transport                                                      | 10/174            | 0.0072                  |
| 163200         | Respiratory electron transport, ATP synthesis by chemiosmotic coupling, and heat production by uncoupling proteins. | 8/123             | 0.0087                  |
| 611105         | Respiratory electron transport                                                                                      | 7/100             | 0.0125                  |
| 180292         | GAB1 signalosome                                                                                                    | 3/17              | 0.0144                  |
| 6799198        | Complex I biogenesis                                                                                                | 5/55              | 0.0183                  |
| 74259          | Purine catabolism                                                                                                   | 3/18              | 0.0204                  |
| 162909         | Host Interactions of HIV factors                                                                                    | 8/131             | 0.0223                  |
| 2393930        | Phosphate bond hydrolysis by NUDT proteins                                                                          | 2/7               | 0.0243                  |
| 69002          | DNA Replication Pre-Initiation                                                                                      | 6/85              | 0.025                   |
| 68882          | Mitotic Anaphase                                                                                                    | 10/200            | 0.0278                  |
| 2555396        | Mitotic Metaphase and Anaphase                                                                                      | 10/201            | 0.0291                  |
| 69239          | Synthesis of DNA                                                                                                    | 7/119             | 0.0354                  |
| 68867          | Assembly of the pre-replicative complex                                                                             | 5/68              | 0.0361                  |
| 400253         | Circadian Clock                                                                                                     | 5/70              | 0.0389                  |
| 5368287        | Mitochondrial translation                                                                                           | 6/96              | 0.0404                  |
| 68949          | Orc1 removal from chromatin                                                                                         | 5/71              | 0.0418                  |
| 174178         | APC/C:Cdh1 mediated degradation of Cdc20 and other APC/C:Cdh1 targeted proteins in late mitosis/early G1            | 5/72              | 0.0473                  |
| 69306          | DNA Replication                                                                                                     | 7/127             | 0.0494                  |
